# Supplementary material
Source: Springer Nature journal article supplement (https://www.springermedizin.de/resource/supplementary/12891_2013_1961_MOESM4_ESM.pdf/9508886)

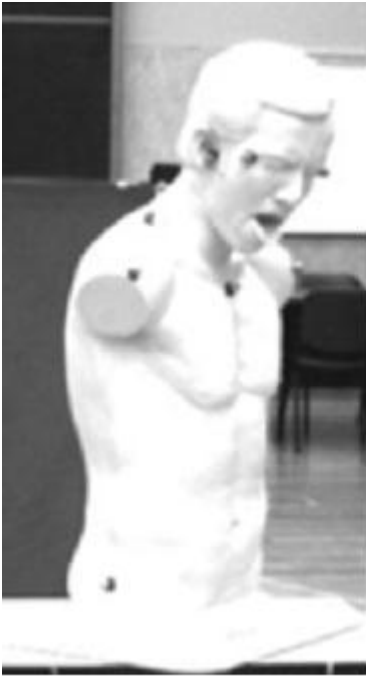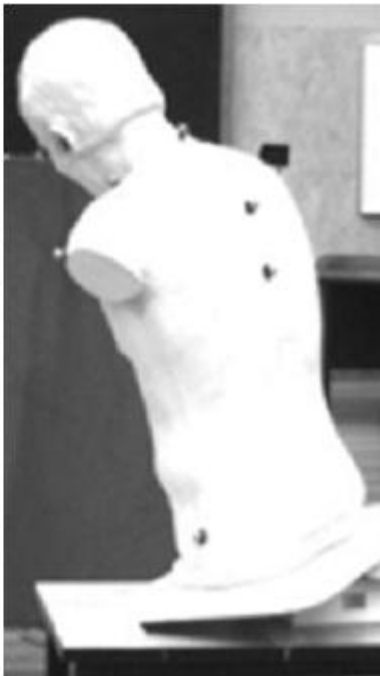

Supplement: MOESM4 [file 9508886]
